# Supplementary material
Source: MDPI journal article supplement (https://www.mdpi.com/2073-4352/8/4/165)
Supplement: s1 [file s1]

Archive with 4 entries (4 files):
- Ba2AlSbS5.cif
- Ba2GaBiSe5-checkcif.pdf
- Ba2GaBiSe5.cif
- Ba2AlSbS5-checkcif.pdf
