# Supplementary material
Source: MDPI journal article supplement (https://www.mdpi.com/2073-4352/8/4/165)
Supplement: s1 [file s1 › Ba2AlSbS5.cif]

 
data_2 
 
_audit_creation_method            SHELXL-97 
_chemical_name_systematic 
; 
 ? 
; 
_chemical_name_common             ? 
_chemical_melting_point           ? 
_chemical_formula_moiety          ? 
_chemical_formula_sum 
 'Al Ba2 S5 Sb' 
_chemical_formula_weight          583.71 
 
loop_ 
 _atom_type_symbol 
 _atom_type_description 
 _atom_type_scat_dispersion_real 
 _atom_type_scat_dispersion_imag 
 _atom_type_scat_source 
 'Al'  'Al'   0.0645   0.0514 
 'International Tables Vol C Tables 4.2.6.8 and 6.1.1.4' 
 'S'  'S'   0.1246   0.1234 
 'International Tables Vol C Tables 4.2.6.8 and 6.1.1.4' 
 'Sb'  'Sb'  -0.5866   1.5461 
 'International Tables Vol C Tables 4.2.6.8 and 6.1.1.4' 
 'Ba'  'Ba'  -0.3244   2.2819 
 'International Tables Vol C Tables 4.2.6.8 and 6.1.1.4' 
 
_symmetry_cell_setting            Orthorhombic 
_symmetry_space_group_name_H-M    Pnma 
 
loop_ 
 _symmetry_equiv_pos_as_xyz 
 'x, y, z' 
 '-x+1/2, -y, z+1/2' 
 '-x, y+1/2, -z' 
 'x+1/2, -y+1/2, -z+1/2' 
 '-x, -y, -z' 
 'x-1/2, y, -z-1/2' 
 'x, -y-1/2, z' 
 '-x-1/2, y-1/2, z-1/2' 
 
_cell_length_a                    12.140(3) 
_cell_length_b                    8.8911(17) 
_cell_length_c                    8.9552(17) 
_cell_angle_alpha                 90.00 
_cell_angle_beta                  90.00 
_cell_angle_gamma                 90.00 
_cell_volume                      966.6(4) 
_cell_formula_units_Z             4 
_cell_measurement_temperature     296(2) 
_cell_measurement_reflns_used     2263 
_cell_measurement_theta_min       2.83 
_cell_measurement_theta_max       27.50 
 
_exptl_crystal_description        'block' 
_exptl_crystal_colour             'pink' 
_exptl_crystal_size_max           0.234 
_exptl_crystal_size_mid           0.136 
_exptl_crystal_size_min           0.080 
_exptl_crystal_density_meas       ? 
_exptl_crystal_density_diffrn     4.011 
_exptl_crystal_density_method     'not measured' 
_exptl_crystal_F_000              1024 
_exptl_absorpt_coefficient_mu     11.922 
_exptl_absorpt_correction_type    multi-scan 
_exptl_absorpt_correction_T_min   0.4304 
_exptl_absorpt_correction_T_max   0.7456 
_exptl_absorpt_process_details    SADABS
 
_exptl_special_details 
; 
 ? 
; 
 
_diffrn_ambient_temperature       296(2) 
_diffrn_radiation_wavelength      0.71073 
_diffrn_radiation_type            MoK\a 
_diffrn_radiation_source          'fine-focus sealed tube' 
_diffrn_radiation_monochromator   graphite 
_diffrn_measurement_device_type   'CCD area detector' 
_diffrn_measurement_method        'phi and omega scans' 
_diffrn_detector_area_resol_mean  ? 
_diffrn_standards_number          ? 
_diffrn_standards_interval_count  ? 
_diffrn_standards_interval_time   ? 
_diffrn_standards_decay_%         ? 
_diffrn_reflns_number             4574 
_diffrn_reflns_av_R_equivalents   0.0483 
_diffrn_reflns_av_sigmaI/netI     0.0315 
_diffrn_reflns_limit_h_min        -14 
_diffrn_reflns_limit_h_max        14 
_diffrn_reflns_limit_k_min        -10 
_diffrn_reflns_limit_k_max        9 
_diffrn_reflns_limit_l_min        -10 
_diffrn_reflns_limit_l_max        9 
_diffrn_reflns_theta_min          2.83 
_diffrn_reflns_theta_max          24.96 
_reflns_number_total              912 
_reflns_number_gt                 845 
_reflns_threshold_expression      >2sigma(I) 
 
_computing_data_collection        'Bruker SMART' 
_computing_cell_refinement        'Bruker SMART' 
_computing_data_reduction         'Bruker SAINT' 
_computing_structure_solution     'SHELXS-97 (Sheldrick, 1990)' 
_computing_structure_refinement   'SHELXL-97 (Sheldrick, 1997)' 
_computing_molecular_graphics     'Bruker SHELXTL' 
_computing_publication_material   'Bruker SHELXTL' 
 
_refine_special_details 
; 
 Refinement of F^2^ against ALL reflections.  The weighted R-factor wR and 
 goodness of fit S are based on F^2^, conventional R-factors R are based 
 on F, with F set to zero for negative F^2^. The threshold expression of 
 F^2^ > 2sigma(F^2^) is used only for calculating R-factors(gt) etc. and is 
 not relevant to the choice of reflections for refinement.  R-factors based 
 on F^2^ are statistically about twice as large as those based on F, and R- 
 factors based on ALL data will be even larger. 
; 
 
_refine_ls_structure_factor_coef  Fsqd  
_refine_ls_matrix_type            full 
_refine_ls_weighting_scheme       calc  
_refine_ls_weighting_details 
 'calc w=1/[\s^2^(Fo^2^)+(0.0202P)^2^+1.6122P] where P=(Fo^2^+2Fc^2^)/3' 
_atom_sites_solution_primary      direct 
_atom_sites_solution_secondary    difmap 
_atom_sites_solution_hydrogens    ? 
_refine_ls_hydrogen_treatment     ? 
_refine_ls_extinction_method      SHELXL 
_refine_ls_extinction_coef        0.00240(17) 
_refine_ls_extinction_expression 
 'Fc^*^=kFc[1+0.001xFc^2^\l^3^/sin(2\q)]^-1/4^' 
_refine_ls_number_reflns          912 
_refine_ls_number_parameters      50 
_refine_ls_number_restraints      0 
_refine_ls_R_factor_all           0.0225 
_refine_ls_R_factor_gt            0.0202 
_refine_ls_wR_factor_ref          0.0485 
_refine_ls_wR_factor_gt           0.0473 
_refine_ls_goodness_of_fit_ref    1.080 
_refine_ls_restrained_S_all       1.080 
_refine_ls_shift/su_max           0.001 
_refine_ls_shift/su_mean          0.000 
 
loop_ 
 _atom_site_label 
 _atom_site_type_symbol 
 _atom_site_fract_x 
 _atom_site_fract_y 
 _atom_site_fract_z 
 _atom_site_U_iso_or_equiv 
 _atom_site_adp_type 
 _atom_site_occupancy 
 _atom_site_symmetry_multiplicity 
 _atom_site_calc_flag 
 _atom_site_refinement_flags 
 _atom_site_disorder_assembly 
 _atom_site_disorder_group 
Sb1 Sb 0.47697(4) 0.2500 0.97632(5) 0.01507(16) Uani 1 2 d S . . 
Ba1 Ba 0.32314(2) -0.00684(3) 0.62067(3) 0.01493(14) Uani 1 1 d . . . 
S1 S 0.28953(14) 0.2500 0.88133(19) 0.0161(4) Uani 1 2 d S . . 
S2 S 0.27141(13) -0.2500 0.88082(18) 0.0145(4) Uani 1 2 d S . . 
S3 S 0.49368(13) -0.2500 0.47234(19) 0.0149(4) Uani 1 2 d S . . 
S4 S 0.44516(9) 0.05325(12) 1.17408(14) 0.0150(3) Uani 1 1 d . . . 
Al1 Al 0.40579(15) 0.2500 1.3247(2) 0.0108(4) Uani 1 2 d S . . 
 
loop_ 
 _atom_site_aniso_label 
 _atom_site_aniso_U_11 
 _atom_site_aniso_U_22 
 _atom_site_aniso_U_33 
 _atom_site_aniso_U_23 
 _atom_site_aniso_U_13 
 _atom_site_aniso_U_12 
Sb1 0.0156(3) 0.0122(2) 0.0174(3) 0.000 0.00002(19) 0.000 
Ba1 0.0153(2) 0.01186(19) 0.0176(2) 0.00137(10) 0.00055(12) -0.00068(10) 
S1 0.0161(8) 0.0147(8) 0.0175(10) 0.000 -0.0001(7) 0.000 
S2 0.0117(8) 0.0143(8) 0.0176(9) 0.000 -0.0010(7) 0.000 
S3 0.0144(8) 0.0164(8) 0.0139(9) 0.000 -0.0018(7) 0.000 
S4 0.0179(6) 0.0101(5) 0.0172(7) -0.0013(5) 0.0002(5) 0.0015(5) 
Al1 0.0110(9) 0.0099(9) 0.0116(10) 0.000 0.0016(8) 0.000 
 
_geom_special_details 
; 
 All esds (except the esd in the dihedral angle between two l.s. planes) 
 are estimated using the full covariance matrix.  The cell esds are taken 
 into account individually in the estimation of esds in distances, angles 
 and torsion angles; correlations between esds in cell parameters are only 
 used when they are defined by crystal symmetry.  An approximate (isotropic) 
 treatment of cell esds is used for estimating esds involving l.s. planes. 
; 
 
loop_ 
 _geom_bond_atom_site_label_1 
 _geom_bond_atom_site_label_2 
 _geom_bond_distance 
 _geom_bond_site_symmetry_2 
 _geom_bond_publ_flag 
Sb1 S1 2.4294(19) . ? 
Sb1 S4 2.5191(13) 7_565 ? 
Sb1 S4 2.5191(13) . ? 
Ba1 S2 3.2397(13) . ? 
Ba1 S3 3.2749(13) . ? 
Ba1 S1 3.2909(13) . ? 
Ba1 S3 3.2945(13) 5_656 ? 
Ba1 S4 3.3180(15) 2_554 ? 
Ba1 S1 3.3375(14) 2_554 ? 
Ba1 S2 3.3386(13) 2_554 ? 
Ba1 S4 3.3853(14) 5_657 ? 
Ba1 Al1 3.6398(16) 1_554 ? 
Ba1 Ba1 4.3239(10) 7 ? 
Ba1 Ba1 4.5672(10) 7_565 ? 
Ba1 Ba1 4.8089(12) 5_656 ? 
S1 Ba1 3.2909(13) 7_565 ? 
S1 Ba1 3.3375(14) 8_666 ? 
S1 Ba1 3.3375(14) 2 ? 
S2 Al1 2.209(3) 2_554 ? 
S2 Ba1 3.2397(13) 7 ? 
S2 Ba1 3.3386(13) 2 ? 
S2 Ba1 3.3386(13) 8_656 ? 
S3 Al1 2.189(3) 5_657 ? 
S3 Ba1 3.2749(13) 7 ? 
S3 Ba1 3.2945(13) 5_656 ? 
S3 Ba1 3.2945(13) 3_646 ? 
S4 Al1 2.2599(17) . ? 
S4 Ba1 3.3180(14) 2 ? 
S4 Ba1 3.3853(14) 5_657 ? 
Al1 S3 2.189(3) 5_657 ? 
Al1 S2 2.209(3) 2 ? 
Al1 S4 2.2599(17) 7_565 ? 
Al1 Ba1 3.6398(16) 7_566 ? 
Al1 Ba1 3.6398(16) 1_556 ? 
 
loop_ 
 _geom_angle_atom_site_label_1 
 _geom_angle_atom_site_label_2 
 _geom_angle_atom_site_label_3 
 _geom_angle 
 _geom_angle_site_symmetry_1 
 _geom_angle_site_symmetry_3 
 _geom_angle_publ_flag 
S1 Sb1 S4 95.89(4) . 7_565 ? 
S1 Sb1 S4 95.89(4) . . ? 
S4 Sb1 S4 87.96(6) 7_565 . ? 
S2 Ba1 S3 88.49(3) . . ? 
S2 Ba1 S1 85.93(3) . . ? 
S3 Ba1 S1 145.51(4) . . ? 
S2 Ba1 S3 140.83(4) . 5_656 ? 
S3 Ba1 S3 85.889(18) . 5_656 ? 
S1 Ba1 S3 77.41(4) . 5_656 ? 
S2 Ba1 S4 67.85(3) . 2_554 ? 
S3 Ba1 S4 126.65(3) . 2_554 ? 
S1 Ba1 S4 82.09(4) . 2_554 ? 
S3 Ba1 S4 141.75(3) 5_656 2_554 ? 
S2 Ba1 S1 87.14(3) . 2_554 ? 
S3 Ba1 S1 64.59(4) . 2_554 ? 
S1 Ba1 S1 148.670(15) . 2_554 ? 
S3 Ba1 S1 124.28(4) 5_656 2_554 ? 
S4 Ba1 S1 67.03(4) 2_554 2_554 ? 
S2 Ba1 S2 148.478(15) . 2_554 ? 
S3 Ba1 S2 114.08(4) . 2_554 ? 
S1 Ba1 S2 86.51(3) . 2_554 ? 
S3 Ba1 S2 66.13(4) 5_656 2_554 ? 
S4 Ba1 S2 80.81(3) 2_554 2_554 ? 
S1 Ba1 S2 83.63(3) 2_554 2_554 ? 
S2 Ba1 S4 71.90(4) . 5_657 ? 
S3 Ba1 S4 67.32(4) . 5_657 ? 
S1 Ba1 S4 78.61(4) . 5_657 ? 
S3 Ba1 S4 70.18(4) 5_656 5_657 ? 
S4 Ba1 S4 136.24(2) 2_554 5_657 ? 
S1 Ba1 S4 127.61(3) 2_554 5_657 ? 
S2 Ba1 S4 135.92(3) 2_554 5_657 ? 
S2 Ba1 Al1 174.76(4) . 1_554 ? 
S3 Ba1 Al1 86.82(3) . 1_554 ? 
S1 Ba1 Al1 96.63(3) . 1_554 ? 
S3 Ba1 Al1 36.38(4) 5_656 1_554 ? 
S4 Ba1 Al1 116.98(3) 2_554 1_554 ? 
S1 Ba1 Al1 92.96(4) 2_554 1_554 ? 
S2 Ba1 Al1 36.59(4) 2_554 1_554 ? 
S4 Ba1 Al1 104.05(4) 5_657 1_554 ? 
S2 Ba1 Ba1 48.14(2) . 7 ? 
S3 Ba1 Ba1 48.69(2) . 7 ? 
S1 Ba1 Ba1 133.94(2) . 7 ? 
S3 Ba1 Ba1 133.88(2) 5_656 7 ? 
S4 Ba1 Ba1 82.856(19) 2_554 7 ? 
S1 Ba1 Ba1 49.63(2) 2_554 7 ? 
S2 Ba1 Ba1 133.16(2) 2_554 7 ? 
S4 Ba1 Ba1 82.999(19) 5_657 7 ? 
Al1 Ba1 Ba1 128.86(2) 1_554 7 ? 
S2 Ba1 Ba1 131.86(2) . 7_565 ? 
S3 Ba1 Ba1 131.31(2) . 7_565 ? 
S1 Ba1 Ba1 46.06(2) . 7_565 ? 
S3 Ba1 Ba1 46.12(2) 5_656 7_565 ? 
S4 Ba1 Ba1 97.144(19) 2_554 7_565 ? 
S1 Ba1 Ba1 130.37(2) 2_554 7_565 ? 
S2 Ba1 Ba1 46.84(2) 2_554 7_565 ? 
S4 Ba1 Ba1 97.001(19) 5_657 7_565 ? 
Al1 Ba1 Ba1 51.14(2) 1_554 7_565 ? 
Ba1 Ba1 Ba1 180.0 7 7_565 ? 
S2 Ba1 Ba1 120.88(3) . 5_656 ? 
S3 Ba1 Ba1 43.10(2) . 5_656 ? 
S1 Ba1 Ba1 114.33(3) . 5_656 ? 
S3 Ba1 Ba1 42.79(2) 5_656 5_656 ? 
S4 Ba1 Ba1 160.83(2) 2_554 5_656 ? 
S1 Ba1 Ba1 95.38(3) 2_554 5_656 ? 
S2 Ba1 Ba1 90.03(3) 2_554 5_656 ? 
S4 Ba1 Ba1 60.34(3) 5_657 5_656 ? 
Al1 Ba1 Ba1 53.89(3) 1_554 5_656 ? 
Ba1 Ba1 Ba1 91.449(6) 7 5_656 ? 
Ba1 Ba1 Ba1 88.551(6) 7_565 5_656 ? 
Sb1 S1 Ba1 97.60(5) . . ? 
Sb1 S1 Ba1 97.60(5) . 7_565 ? 
Ba1 S1 Ba1 87.88(4) . 7_565 ? 
Sb1 S1 Ba1 99.15(5) . 8_666 ? 
Ba1 S1 Ba1 162.91(6) . 8_666 ? 
Ba1 S1 Ba1 93.259(17) 7_565 8_666 ? 
Sb1 S1 Ba1 99.15(5) . 2 ? 
Ba1 S1 Ba1 93.259(17) . 2 ? 
Ba1 S1 Ba1 162.91(6) 7_565 2 ? 
Ba1 S1 Ba1 80.75(4) 8_666 2 ? 
Al1 S2 Ba1 91.44(6) 2_554 7 ? 
Al1 S2 Ba1 91.44(6) 2_554 . ? 
Ba1 S2 Ba1 83.72(4) 7 . ? 
Al1 S2 Ba1 79.14(5) 2_554 2 ? 
Ba1 S2 Ba1 170.32(6) 7 2 ? 
Ba1 S2 Ba1 94.177(15) . 2 ? 
Al1 S2 Ba1 79.14(5) 2_554 8_656 ? 
Ba1 S2 Ba1 94.177(15) 7 8_656 ? 
Ba1 S2 Ba1 170.32(6) . 8_656 ? 
Ba1 S2 Ba1 86.31(4) 2 8_656 ? 
Al1 S3 Ba1 90.90(6) 5_657 7 ? 
Al1 S3 Ba1 90.90(6) 5_657 . ? 
Ba1 S3 Ba1 82.62(4) 7 . ? 
Al1 S3 Ba1 80.43(5) 5_657 5_656 ? 
Ba1 S3 Ba1 170.70(6) 7 5_656 ? 
Ba1 S3 Ba1 94.111(18) . 5_656 ? 
Al1 S3 Ba1 80.43(5) 5_657 3_646 ? 
Ba1 S3 Ba1 94.111(19) 7 3_646 ? 
Ba1 S3 Ba1 170.70(6) . 3_646 ? 
Ba1 S3 Ba1 87.76(4) 5_656 3_646 ? 
Al1 S4 Sb1 85.09(5) . . ? 
Al1 S4 Ba1 88.55(6) . 2 ? 
Sb1 S4 Ba1 97.79(4) . 2 ? 
Al1 S4 Ba1 86.91(6) . 5_657 ? 
Sb1 S4 Ba1 109.81(4) . 5_657 ? 
Ba1 S4 Ba1 151.50(4) 2 5_657 ? 
S3 Al1 S2 110.72(10) 5_657 2 ? 
S3 Al1 S4 112.18(7) 5_657 . ? 
S2 Al1 S4 109.98(7) 2 . ? 
S3 Al1 S4 112.18(7) 5_657 7_565 ? 
S2 Al1 S4 109.98(7) 2 7_565 ? 
S4 Al1 S4 101.44(10) . 7_565 ? 
S3 Al1 Ba1 63.19(5) 5_657 7_566 ? 
S2 Al1 Ba1 64.27(5) 2 7_566 ? 
S4 Al1 Ba1 168.11(6) . 7_566 ? 
S4 Al1 Ba1 90.41(4) 7_565 7_566 ? 
S3 Al1 Ba1 63.19(5) 5_657 1_556 ? 
S2 Al1 Ba1 64.27(5) 2 1_556 ? 
S4 Al1 Ba1 90.41(4) . 1_556 ? 
S4 Al1 Ba1 168.11(6) 7_565 1_556 ? 
Ba1 Al1 Ba1 77.72(4) 7_566 1_556 ? 
 
_diffrn_measured_fraction_theta_max    1.000 
_diffrn_reflns_theta_full              24.96 
_diffrn_measured_fraction_theta_full   1.000 
_refine_diff_density_max    1.351 
_refine_diff_density_min   -0.780 
_refine_diff_density_rms    0.196 
