# Supplementary material
Source: MDPI journal article supplement (https://www.mdpi.com/2073-4352/8/4/165)
Supplement: s1 [file s1 › Ba2GaBiSe5.cif]

 
data_2 
 
_audit_creation_method            SHELXL-97 
_chemical_name_systematic 
; 
 ? 
; 
_chemical_name_common             ? 
_chemical_melting_point           ? 
_chemical_formula_moiety          ? 
_chemical_formula_sum 
 'Ba2 Bi Ga Se5' 
_chemical_formula_weight          948.18 
 
loop_ 
 _atom_type_symbol 
 _atom_type_description 
 _atom_type_scat_dispersion_real 
 _atom_type_scat_dispersion_imag 
 _atom_type_scat_source 
 'Ga'  'Ga'   0.2307   1.6083 
 'International Tables Vol C Tables 4.2.6.8 and 6.1.1.4' 
 'Se'  'Se'  -0.0929   2.2259 
 'International Tables Vol C Tables 4.2.6.8 and 6.1.1.4' 
 'Ba'  'Ba'  -0.3244   2.2819 
 'International Tables Vol C Tables 4.2.6.8 and 6.1.1.4' 
 'Bi'  'Bi'  -4.1077  10.2566 
 'International Tables Vol C Tables 4.2.6.8 and 6.1.1.4' 
 
_symmetry_cell_setting           'Orthorhombic'
_symmetry_space_group_name_H-M   'Pnma'
 
loop_ 
 _symmetry_equiv_pos_as_xyz 
 'x, y, z' 
 '-x+1/2, -y, z+1/2' 
 '-x, y+1/2, -z' 
 'x+1/2, -y+1/2, -z+1/2' 
 '-x, -y, -z' 
 'x-1/2, y, -z-1/2' 
 'x, -y-1/2, z' 
 '-x-1/2, y-1/2, z-1/2' 
 
_cell_length_a                    12.691(4) 
_cell_length_b                    9.190(3) 
_cell_length_c                    9.245(3) 
_cell_angle_alpha                 90.00 
_cell_angle_beta                  90.00 
_cell_angle_gamma                 90.00 
_cell_volume                      1078.2(6) 
_cell_formula_units_Z             4 
_cell_measurement_temperature     296(2) 
_cell_measurement_reflns_used    1209
_cell_measurement_theta_min        2.73
_cell_measurement_theta_max       27.25
 
_exptl_crystal_description        block 
_exptl_crystal_colour             red 
_exptl_crystal_size_max           0.165 
_exptl_crystal_size_mid           0.128
_exptl_crystal_size_min           0.105 
_exptl_crystal_density_meas       ? 
_exptl_crystal_density_diffrn     5.841 
_exptl_crystal_density_method     'not measured' 
_exptl_crystal_F_000              1584 
_exptl_absorpt_coefficient_mu     42.757 
_exptl_absorpt_correction_type    multi-scan 
_exptl_absorpt_correction_T_min   0.4304 
_exptl_absorpt_correction_T_max   0.7456 
_exptl_absorpt_process_details    SADABS 
 
_exptl_special_details 
; 
 ? 
; 
 
_diffrn_ambient_temperature       296(2) 
_diffrn_radiation_wavelength      0.71073 
_diffrn_radiation_type            MoK\a 
_diffrn_radiation_source          'fine-focus sealed tube' 
_diffrn_radiation_monochromator   graphite 
_diffrn_measurement_device_type  'CCD area detector'
_diffrn_measurement_method       'phi and omega scans'
_diffrn_detector_area_resol_mean  ? 
_diffrn_standards_number          ? 
_diffrn_standards_interval_count  ? 
_diffrn_standards_interval_time   ? 
_diffrn_standards_decay_%         ? 
_diffrn_reflns_number             6174 
_diffrn_reflns_av_R_equivalents   0.0566 
_diffrn_reflns_av_sigmaI/netI     0.0437 
_diffrn_reflns_limit_h_min        -16 
_diffrn_reflns_limit_h_max        16 
_diffrn_reflns_limit_k_min        -11 
_diffrn_reflns_limit_k_max        11 
_diffrn_reflns_limit_l_min        -6 
_diffrn_reflns_limit_l_max        11 
_diffrn_reflns_theta_min          2.73 
_diffrn_reflns_theta_max          27.36 
_reflns_number_total              1293 
_reflns_number_gt                 1082 
_reflns_threshold_expression      >2sigma(I) 
 
_computing_data_collection      'Bruker SMART'
_computing_cell_refinement      'Bruker SMART'
_computing_data_reduction       'Bruker SAINT'
_computing_structure_solution   'Bruker SHELXTL'
_computing_structure_refinement 'Bruker SHELXTL'
_computing_molecular_graphics   'Bruker SHELXTL'
_computing_publication_material 'Bruker SHELXTL'
 
_refine_special_details 
; 
 Refinement of F^2^ against ALL reflections.  The weighted R-factor wR and 
 goodness of fit S are based on F^2^, conventional R-factors R are based 
 on F, with F set to zero for negative F^2^. The threshold expression of 
 F^2^ > 2sigma(F^2^) is used only for calculating R-factors(gt) etc. and is 
 not relevant to the choice of reflections for refinement.  R-factors based 
 on F^2^ are statistically about twice as large as those based on F, and R- 
 factors based on ALL data will be even larger. 
; 
 
_refine_ls_structure_factor_coef  Fsqd  
_refine_ls_matrix_type            full 
_refine_ls_weighting_scheme       calc  
_refine_ls_weighting_details 
 'calc w=1/[\s^2^(Fo^2^)+(0.0188P)^2^+0.0000P] where P=(Fo^2^+2Fc^2^)/3' 
_atom_sites_solution_primary      direct 
_atom_sites_solution_secondary    difmap 
_atom_sites_solution_hydrogens    ? 
_refine_ls_hydrogen_treatment     ? 
_refine_ls_extinction_method      SHELXL 
_refine_ls_extinction_coef        0.00084(6) 
_refine_ls_extinction_expression 
 'Fc^*^=kFc[1+0.001xFc^2^\l^3^/sin(2\q)]^-1/4^' 
_refine_ls_number_reflns          1293 
_refine_ls_number_parameters      50 
_refine_ls_number_restraints      0 
_refine_ls_R_factor_all           0.0371 
_refine_ls_R_factor_gt            0.0273 
_refine_ls_wR_factor_ref          0.0535 
_refine_ls_wR_factor_gt           0.0499 
_refine_ls_goodness_of_fit_ref    0.997 
_refine_ls_restrained_S_all       0.997 
_refine_ls_shift/su_max           0.000 
_refine_ls_shift/su_mean          0.000 
 
loop_ 
 _atom_site_label 
 _atom_site_type_symbol 
 _atom_site_fract_x 
 _atom_site_fract_y 
 _atom_site_fract_z 
 _atom_site_U_iso_or_equiv 
 _atom_site_adp_type 
 _atom_site_occupancy 
 _atom_site_symmetry_multiplicity 
 _atom_site_calc_flag 
 _atom_site_refinement_flags 
 _atom_site_disorder_assembly 
 _atom_site_disorder_group 
Bi1 Bi 0.47519(3) 0.2500 0.03113(5) 0.01587(13) Uani 1 2 d S . . 
Ba1 Ba 0.32414(4) -0.00786(5) 0.38199(6) 0.01646(14) Uani 1 1 d . . . 
Ga1 Ga 0.40211(9) 0.2500 0.66806(14) 0.0135(3) Uani 1 2 d S . . 
Se1 Se 0.27830(8) 0.2500 0.12712(13) 0.0159(3) Uani 1 2 d S . . 
Se2 Se 0.44094(6) 0.04172(9) -0.17895(10) 0.0159(2) Uani 1 1 d . . . 
Se3 Se 0.21889(8) 0.2500 0.61472(13) 0.0152(3) Uani 1 2 d S . . 
Se4 Se 0.49301(8) -0.2500 0.54025(13) 0.0158(3) Uani 1 2 d S . . 
 
loop_ 
 _atom_site_aniso_label 
 _atom_site_aniso_U_11 
 _atom_site_aniso_U_22 
 _atom_site_aniso_U_33 
 _atom_site_aniso_U_23 
 _atom_site_aniso_U_13 
 _atom_site_aniso_U_12 
Bi1 0.0144(2) 0.0153(2) 0.0180(3) 0.000 -0.00073(18) 0.000 
Ba1 0.0166(2) 0.0148(3) 0.0181(3) -0.0008(2) -0.0006(2) -0.00095(19) 
Ga1 0.0121(6) 0.0142(6) 0.0142(7) 0.000 -0.0015(5) 0.000 
Se1 0.0139(5) 0.0174(6) 0.0162(7) 0.000 0.0000(5) 0.000 
Se2 0.0181(4) 0.0128(4) 0.0168(5) 0.0012(3) -0.0009(3) 0.0021(3) 
Se3 0.0118(5) 0.0169(6) 0.0169(7) 0.000 -0.0013(5) 0.000 
Se4 0.0131(5) 0.0184(6) 0.0158(6) 0.000 0.0009(5) 0.000 
 
_geom_special_details 
; 
 All esds (except the esd in the dihedral angle between two l.s. planes) 
 are estimated using the full covariance matrix.  The cell esds are taken 
 into account individually in the estimation of esds in distances, angles 
 and torsion angles; correlations between esds in cell parameters are only 
 used when they are defined by crystal symmetry.  An approximate (isotropic) 
 treatment of cell esds is used for estimating esds involving l.s. planes. 
; 
 
loop_ 
 _geom_bond_atom_site_label_1 
 _geom_bond_atom_site_label_2 
 _geom_bond_distance 
 _geom_bond_site_symmetry_2 
 _geom_bond_publ_flag 
Bi1 Se1 2.6517(14) . ? 
Bi1 Se2 2.7612(11) . ? 
Bi1 Se2 2.7612(11) 7_565 ? 
Bi1 Se2 3.1918(11) 3_655 ? 
Bi1 Se2 3.1918(11) 5_655 ? 
Ba1 Se3 3.3697(13) 2_554 ? 
Ba1 Se1 3.3920(13) . ? 
Ba1 Se4 3.3937(12) 5_656 ? 
Ba1 Se4 3.4184(12) . ? 
Ba1 Se2 3.4252(14) 2 ? 
Ba1 Se1 3.4318(13) 2 ? 
Ba1 Se3 3.4683(12) . ? 
Ba1 Se2 3.5367(13) 5_655 ? 
Ba1 Ba1 4.4504(18) 7 ? 
Ba1 Ba1 4.7394(18) 7_565 ? 
Ga1 Se4 2.3409(18) 5_656 ? 
Ga1 Se3 2.3770(17) . ? 
Ga1 Se2 2.4304(13) 7_566 ? 
Ga1 Se2 2.4304(13) 1_556 ? 
Ga1 Ba1 3.6863(14) 7_565 ? 
Se1 Ba1 3.3920(13) 7_565 ? 
Se1 Ba1 3.4318(13) 2_554 ? 
Se1 Ba1 3.4318(13) 8_665 ? 
Se2 Ga1 2.4304(13) 1_554 ? 
Se2 Bi1 3.1918(11) 5_655 ? 
Se2 Ba1 3.4252(14) 2_554 ? 
Se2 Ba1 3.5367(13) 5_655 ? 
Se3 Ba1 3.3697(13) 8_666 ? 
Se3 Ba1 3.3697(13) 2 ? 
Se3 Ba1 3.4683(12) 7_565 ? 
Se4 Ga1 2.3409(18) 5_656 ? 
Se4 Ba1 3.3937(12) 5_656 ? 
Se4 Ba1 3.3937(12) 3_646 ? 
Se4 Ba1 3.4184(12) 7 ? 
 
loop_ 
 _geom_angle_atom_site_label_1 
 _geom_angle_atom_site_label_2 
 _geom_angle_atom_site_label_3 
 _geom_angle 
 _geom_angle_site_symmetry_1 
 _geom_angle_site_symmetry_3 
 _geom_angle_publ_flag 
Se1 Bi1 Se2 94.99(3) . . ? 
Se1 Bi1 Se2 94.99(3) . 7_565 ? 
Se2 Bi1 Se2 87.76(5) . 7_565 ? 
Se1 Bi1 Se2 99.84(2) . 3_655 ? 
Se2 Bi1 Se2 159.37(2) . 3_655 ? 
Se2 Bi1 Se2 76.79(3) 7_565 3_655 ? 
Se1 Bi1 Se2 99.84(2) . 5_655 ? 
Se2 Bi1 Se2 76.79(3) . 5_655 ? 
Se2 Bi1 Se2 159.37(2) 7_565 5_655 ? 
Se2 Bi1 Se2 114.27(4) 3_655 5_655 ? 
Se3 Ba1 Se1 85.65(4) 2_554 . ? 
Se3 Ba1 Se4 136.66(3) 2_554 5_656 ? 
Se1 Ba1 Se4 77.09(3) . 5_656 ? 
Se3 Ba1 Se4 89.17(3) 2_554 . ? 
Se1 Ba1 Se4 149.27(3) . . ? 
Se4 Ba1 Se4 86.28(3) 5_656 . ? 
Se3 Ba1 Se2 70.14(2) 2_554 2 ? 
Se1 Ba1 Se2 77.34(3) . 2 ? 
Se4 Ba1 Se2 140.34(3) 5_656 2 ? 
Se4 Ba1 Se2 128.83(3) . 2 ? 
Se3 Ba1 Se1 89.69(3) 2_554 2 ? 
Se1 Ba1 Se1 147.856(19) . 2 ? 
Se4 Ba1 Se1 124.88(4) 5_656 2 ? 
Se4 Ba1 Se1 62.15(3) . 2 ? 
Se2 Ba1 Se1 71.19(3) 2 2 ? 
Se3 Ba1 Se3 147.53(2) 2_554 . ? 
Se1 Ba1 Se3 83.54(3) . . ? 
Se4 Ba1 Se3 69.81(3) 5_656 . ? 
Se4 Ba1 Se3 114.88(4) . . ? 
Se2 Ba1 Se3 77.63(3) 2 . ? 
Se1 Ba1 Se3 83.54(3) 2 . ? 
Se3 Ba1 Se2 71.90(3) 2_554 5_655 ? 
Se1 Ba1 Se2 80.64(3) . 5_655 ? 
Se4 Ba1 Se2 66.26(3) 5_656 5_655 ? 
Se4 Ba1 Se2 68.98(3) . 5_655 ? 
Se2 Ba1 Se2 137.11(2) 2 5_655 ? 
Se1 Ba1 Se2 127.79(3) 2 5_655 ? 
Se3 Ba1 Se2 135.56(2) . 5_655 ? 
Se3 Ba1 Ba1 48.67(2) 2_554 7 ? 
Se1 Ba1 Ba1 134.32(2) . 7 ? 
Se4 Ba1 Ba1 134.288(19) 5_656 7 ? 
Se4 Ba1 Ba1 49.387(18) . 7 ? 
Se2 Ba1 Ba1 84.788(15) 2 7 ? 
Se1 Ba1 Ba1 49.58(2) 2 7 ? 
Se3 Ba1 Ba1 133.10(2) . 7 ? 
Se2 Ba1 Ba1 84.952(15) 5_655 7 ? 
Se3 Ba1 Ba1 131.33(2) 2_554 7_565 ? 
Se1 Ba1 Ba1 45.68(2) . 7_565 ? 
Se4 Ba1 Ba1 45.712(19) 5_656 7_565 ? 
Se4 Ba1 Ba1 130.613(18) . 7_565 ? 
Se2 Ba1 Ba1 95.212(15) 2 7_565 ? 
Se1 Ba1 Ba1 130.422(19) 2 7_565 ? 
Se3 Ba1 Ba1 46.90(2) . 7_565 ? 
Se2 Ba1 Ba1 95.048(15) 5_655 7_565 ? 
Ba1 Ba1 Ba1 180.000(12) 7 7_565 ? 
Se4 Ga1 Se3 112.68(7) 5_656 . ? 
Se4 Ga1 Se2 111.31(4) 5_656 7_566 ? 
Se3 Ga1 Se2 108.61(4) . 7_566 ? 
Se4 Ga1 Se2 111.31(4) 5_656 1_556 ? 
Se3 Ga1 Se2 108.61(4) . 1_556 ? 
Se2 Ga1 Se2 103.91(7) 7_566 1_556 ? 
Se4 Ga1 Ba1 64.05(4) 5_656 7_565 ? 
Se3 Ga1 Ba1 65.71(3) . 7_565 ? 
Se2 Ga1 Ba1 88.03(3) 7_566 7_565 ? 
Se2 Ga1 Ba1 168.01(4) 1_556 7_565 ? 
Bi1 Se1 Ba1 94.06(3) . 7_565 ? 
Bi1 Se1 Ba1 94.06(3) . . ? 
Ba1 Se1 Ba1 88.63(4) 7_565 . ? 
Bi1 Se1 Ba1 97.82(3) . 2_554 ? 
Ba1 Se1 Ba1 167.60(4) 7_565 2_554 ? 
Ba1 Se1 Ba1 94.05(3) . 2_554 ? 
Bi1 Se1 Ba1 97.82(3) . 8_665 ? 
Ba1 Se1 Ba1 94.05(3) 7_565 8_665 ? 
Ba1 Se1 Ba1 167.60(4) . 8_665 ? 
Ba1 Se1 Ba1 80.84(4) 2_554 8_665 ? 
Ga1 Se2 Bi1 83.99(4) 1_554 . ? 
Ga1 Se2 Bi1 168.03(5) 1_554 5_655 ? 
Bi1 Se2 Bi1 103.21(3) . 5_655 ? 
Ga1 Se2 Ba1 88.17(4) 1_554 2_554 ? 
Bi1 Se2 Ba1 95.85(3) . 2_554 ? 
Bi1 Se2 Ba1 100.42(3) 5_655 2_554 ? 
Ga1 Se2 Ba1 86.06(4) 1_554 5_655 ? 
Bi1 Se2 Ba1 107.55(3) . 5_655 ? 
Bi1 Se2 Ba1 82.66(2) 5_655 5_655 ? 
Ba1 Se2 Ba1 155.13(3) 2_554 5_655 ? 
Ga1 Se3 Ba1 90.37(4) . 8_666 ? 
Ga1 Se3 Ba1 90.37(4) . 2 ? 
Ba1 Se3 Ba1 82.65(4) 8_666 2 ? 
Ga1 Se3 Ba1 75.64(3) . . ? 
Ba1 Se3 Ba1 165.58(4) 8_666 . ? 
Ba1 Se3 Ba1 93.79(3) 2 . ? 
Ga1 Se3 Ba1 75.64(3) . 7_565 ? 
Ba1 Se3 Ba1 93.79(3) 8_666 7_565 ? 
Ba1 Se3 Ba1 165.58(4) 2 7_565 ? 
Ba1 Se3 Ba1 86.20(4) . 7_565 ? 
Ga1 Se4 Ba1 77.61(4) 5_656 5_656 ? 
Ga1 Se4 Ba1 77.61(4) 5_656 3_646 ? 
Ba1 Se4 Ba1 88.58(4) 5_656 3_646 ? 
Ga1 Se4 Ba1 90.25(4) 5_656 7 ? 
Ba1 Se4 Ba1 166.88(4) 5_656 7 ? 
Ba1 Se4 Ba1 93.72(3) 3_646 7 ? 
Ga1 Se4 Ba1 90.25(4) 5_656 . ? 
Ba1 Se4 Ba1 93.72(3) 5_656 . ? 
Ba1 Se4 Ba1 166.88(4) 3_646 . ? 
Ba1 Se4 Ba1 81.23(4) 7 . ? 
 
_diffrn_measured_fraction_theta_max    0.998 
_diffrn_reflns_theta_full              27.36 
_diffrn_measured_fraction_theta_full   0.998 
_refine_diff_density_max    1.570 
_refine_diff_density_min   -1.648 
_refine_diff_density_rms    0.333 
